# Supplementary material
Source: HighWire-hosted journal article supplement (https://jitc.bmj.com/content/8/1/e000480)

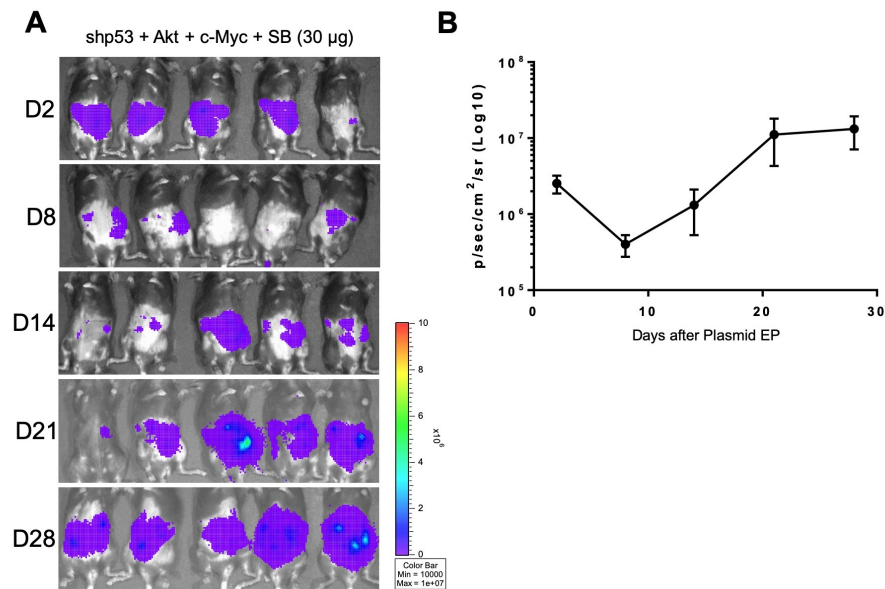

Supplemental Figure 1

Supplement: inline-supplementary-material-2 [file inline-supplementary-material-2.pdf]

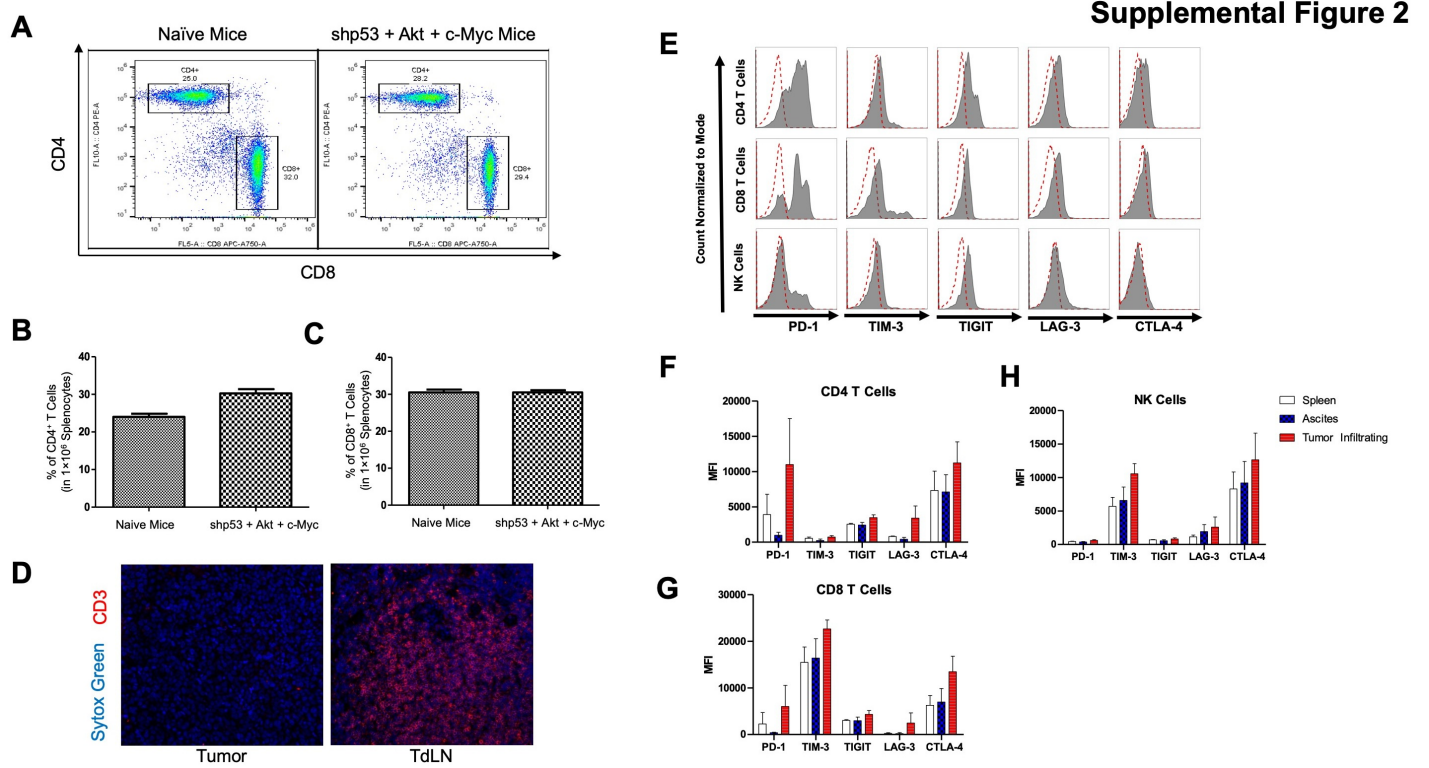

Supplement: inline-supplementary-material-3 [file inline-supplementary-material-3.pdf]

**Supplemental Figure 2 (continued)**

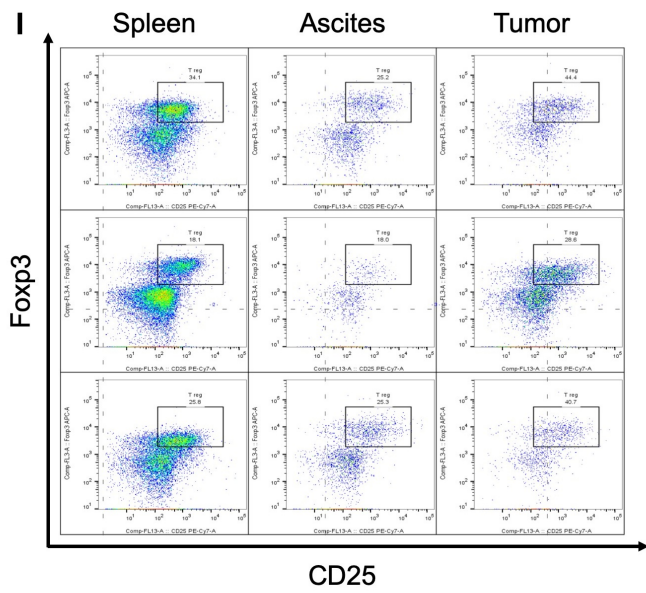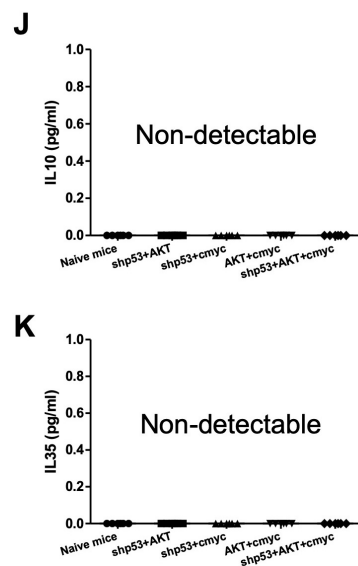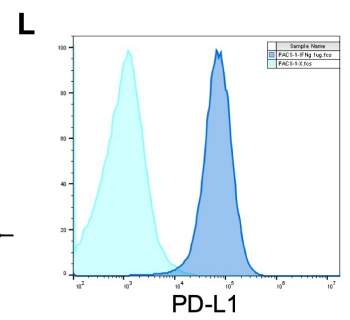

Supplement: inline-supplementary-material-4 [file inline-supplementary-material-4.pdf]

**Supplemental Figure 3**

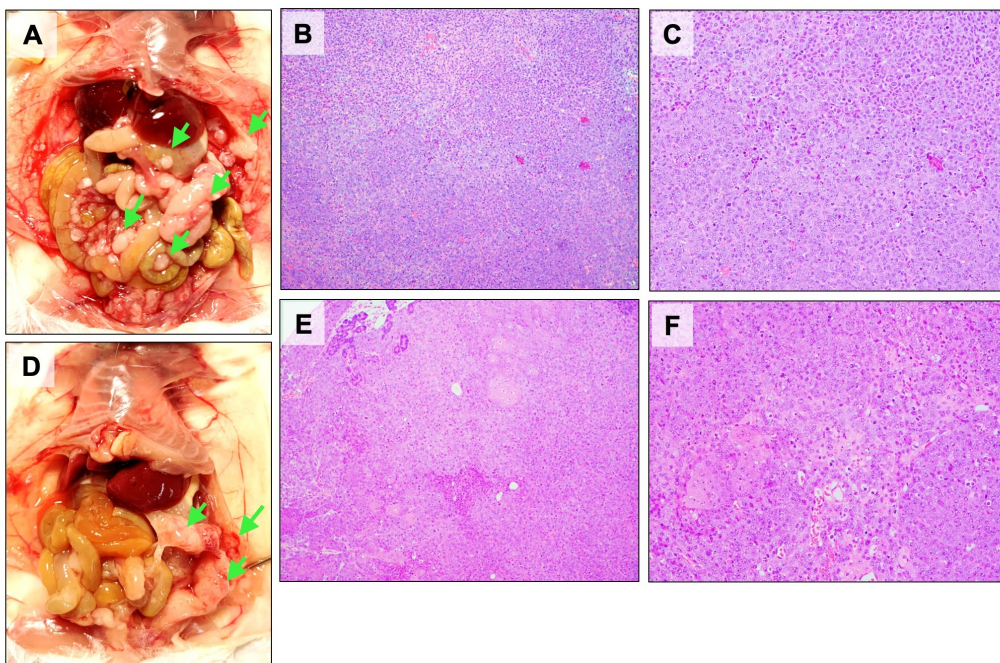

Supplement: inline-supplementary-material-5 [file inline-supplementary-material-5.pdf]
